# Supplementary material for: Sensitivity of tropospheric ozone to halogen chemistry in the chemistry–climate model LMDZ-INCA vNMHC
Source: Copernicus journal article supplement (doi:10.5194/gmd-16-4041-2023), 2023-07-18
Supplement: Supplementary file 1 [file gmd-16-4041-2023-supplement.pdf]

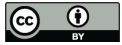

*Supplement of*

## **Sensitivity of tropospheric ozone to halogen chemistry in the chemistry–climate model LMDZ-INCA vNMHC**

**Cyril Caram et al.**

*Correspondence to:* Sophie Szopa ([sophie.szopa@lsce.ipsl.fr](mailto:sophie.szopa@lsce.ipsl.fr))

The copyright of individual parts of the supplement might differ from the article licence.

Table S1. Henry's law coefficients and molar heats of formation of halogen species.

| Compound                      | Henry's law constant (H)<br>at 298 K in M/atm | Reference              | $d(\ln H) /$<br>$d(1/T)$ in K | Reference                     |
|-------------------------------|-----------------------------------------------|------------------------|-------------------------------|-------------------------------|
| HOBBr                         | $1.9 \cdot 10^3$                              | Frenzel et al., (1998) | $6.0 \cdot 10^3$              | McGrath and Rowland (1994)    |
| HBr                           | $7.1 \cdot 10^{13}$                           | Frenzel et al., (1998) | $1.02 \cdot 10^4$             | Schweitzer et al. (2000)      |
| BrNO <sub>2</sub>             | 0.3                                           | Frenzel et al., (1998) | -                             | -                             |
| BrNO <sub>3</sub>             | $10^{20}$                                     | Sander (2015)          | -                             | -                             |
| Br <sub>2</sub>               | 0.76                                          | Dean (1992)            | $3.72 \cdot 10^3$             | Dean (1992)                   |
| HOCl                          | $6.5 \cdot 10^3$                              | Sander (2015)          | $5.9 \cdot 10^3$              | Sander (2015)                 |
| HCl                           | $7.1 \cdot 10^{15}$                           | Sander (2015)          | $5.9 \cdot 10^3$              | Sander (2015)                 |
| ClNO <sub>3</sub>             | $2.69 \cdot 10^{15}$                          | Sander (2015)          | -                             | -                             |
| BrCl                          | 0.97                                          | Sander (2015)          | -                             | -                             |
| ICl                           | $1.11 \cdot 10^2$                             | Sander (2015)          | $2.11 \cdot 10^3$             | Sander et al. (2006)          |
| IBr                           | $2.43 \cdot 10$                               | Sander (2015)          | $4.92 \cdot 10^3$             | Sander et al. (2006)          |
| HOI                           | $1.53 \cdot 10^3$                             | Sander (2015)          | $8.37 \cdot 10^3$             | Sander et al. (2006)          |
| HI                            | $7.43 \cdot 10^{13}$                          | Sander (2015)          | $3.19 \cdot 10^3$             | Sander et al. (2006)          |
| INO <sub>3</sub>              | $2.69 \cdot 10^{15}$                          | Vogt et al. (1999)     | $3.98 \cdot 10^4$             | Kaltsoyannis and Plane (2008) |
| I <sub>2</sub> O <sub>2</sub> | $2.69 \cdot 10^{15}$                          | Analogie avec INO3     | $1.89 \cdot 10^4$             | Kaltsoyannis and Plane (2008) |
| I <sub>2</sub>                | 2.63                                          | Sander (2015)          | $7.51 \cdot 10^3$             | Sander et al. (2006)          |
| INO <sub>2</sub>              | 0.3                                           | Analogie avec BrNO3    | $7.24 \cdot 10^3$             | Sander et al. (2006)          |
| I <sub>2</sub> O <sub>3</sub> | $2.69 \cdot 10^{15}$                          | Analogie avec INO3     | $7.7 \cdot 10^3$              | Kaltsoyannis and Plane (2008) |
| I <sub>2</sub> O <sub>4</sub> | $2.69 \cdot 10^{15}$                          | Analogie avec INO3     | $1.34 \cdot 10^4$             | Kaltsoyannis and Plane (2008) |
| Cl <sub>2</sub>               | 0.086                                         |                        | $2 \cdot 10^3$                | Kavanaugh and Trussell (1980) |
| ClNO <sub>2</sub>             | 0.024                                         | Sander (2015)          | -                             | Behnke et al. (1997)          |

Table S2: Preindustrial and present-day surface emissions and methane concentrations considered in the LMDz-INCA simulations

## Surface emissions (Tg/yr)

|                               | Preindustrial | Present |
|-------------------------------|---------------|---------|
| alkan                         | 1,2           | 55,1    |
| alken                         | 1,8           | 9,0     |
| isop                          | 526,7         | 526,7   |
| mek                           | 1,1           | 3,3     |
| mvk                           | 0,0           | 1,4     |
| apin                          | 121,5         | 121,5   |
| arom                          | 12,7          | 45,4    |
| C <sub>2</sub> H <sub>2</sub> | 1,8           | 5,6     |
| C <sub>2</sub> H <sub>4</sub> | 6,1           | 13,3    |

|                                       |       |       |
|---------------------------------------|-------|-------|
| C <sub>2</sub> H <sub>5</sub> OH      | 1,1   | 8,7   |
| C <sub>2</sub> H <sub>6</sub>         | 3,7   | 8,7   |
| C <sub>3</sub> H <sub>6</sub>         | 4,1   | 8,1   |
| C <sub>3</sub> H <sub>8</sub>         | 0,9   | 6,3   |
| CH <sub>2</sub> O                     | 9,2   | 13,9  |
| CH <sub>3</sub> CHO                   | 19,0  | 22,1  |
| CH <sub>3</sub> COCH <sub>3</sub>     | 60,7  | 62,9  |
| CH <sub>3</sub> OH                    | 106,9 | 110,4 |
| CO                                    | 432,4 | 971,7 |
| NO                                    | 13,2  | 103,8 |
| Tropospheric concentrations (in ppbv) |       |       |
| CH <sub>4</sub>                       | 792   | 1800  |

Table S3. Comparison of reactive Chlorine Cl\* (Cl<sub>2</sub>, HOCl, ClNO<sub>2</sub>, ClNO<sub>3</sub>) between LMDZ-INCA, GEOS-Chem and observations in oceanic regions. Measurements are 24h means but each value represents a mean of several days of measurement. Model outputs represent respective monthly means (2010 for LMDZ-INCA and 2016 for GEOS-Chem) in the same location.

| Location                      | Months       | Cl* simulated with<br>GEOS-Chem (ppt) | Cl* simulated with<br>LMDz-INCA (ppt) | Measured Cl* (ppt) | Reference             |
|-------------------------------|--------------|---------------------------------------|---------------------------------------|--------------------|-----------------------|
| Eastern Atlantic              | Oct – Nov    | 43                                    | 80 (72 being ClNO <sub>2</sub> )      | 27                 | Keene et al. (2009)   |
| Atlantic near Northern Africa | Oct – Nov    | 5                                     | 14.2                                  | <24                | Keene et al. (2009)   |
| Tropical Atlantic             | Oct – Nov    | 2                                     | 1.4                                   | <24                | Keene et al. (2009)   |
| Southern Atlantic             | Oct – Nov    | 4                                     | 3.4                                   | <24                | Keene et al. (2009)   |
| Appledore island              | Juillet-Aout | 17                                    | 1.4                                   | <20                | Keene et al. (2007)   |
| Hawaii                        | Septembre    | 4                                     | 3.4                                   | 6                  | Pszenny et al. (2004) |
| Alert (Canada)                | Mars – Avril | 0.2                                   | 1.4                                   | <14                | Impey et al. (1999)   |

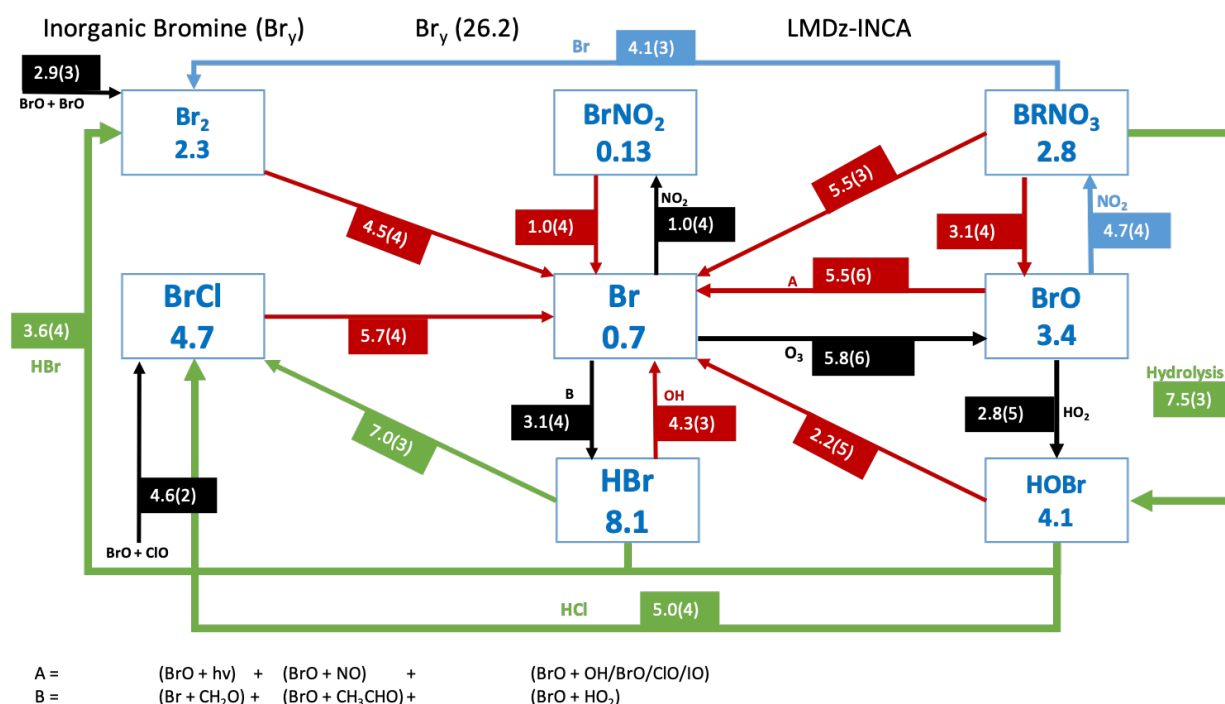

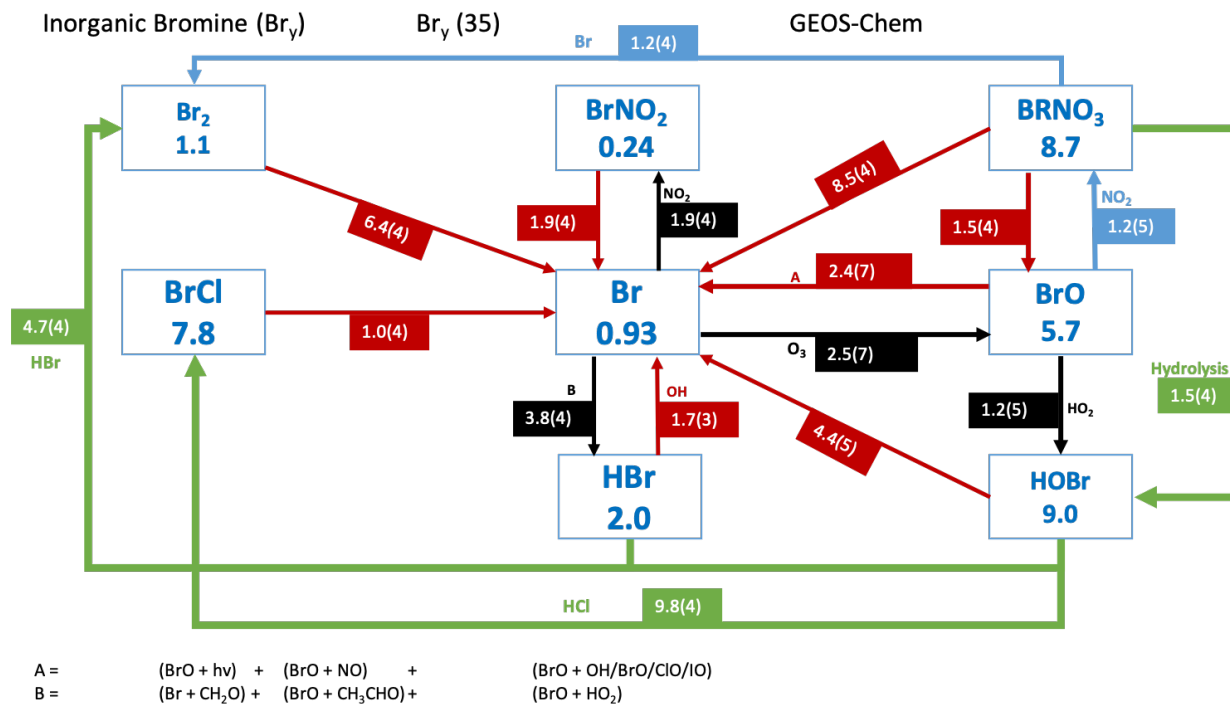

**Figure S1 : Global budget and cycling of tropospheric bromine ( $Br_y$ ) in LMDZ-INCA (this work, upper panel) and GEOS-Chem (from Schmidt et al. 2016, lower panel). Tropospheric global burden of inorganic bromines (Gg  $Br$ ) and fluxes through reactions (Gg  $Br_y$ .yr<sup>-1</sup>) are indicated. Read 1.2 (4) as  $1.2 \times 10^4$ .**

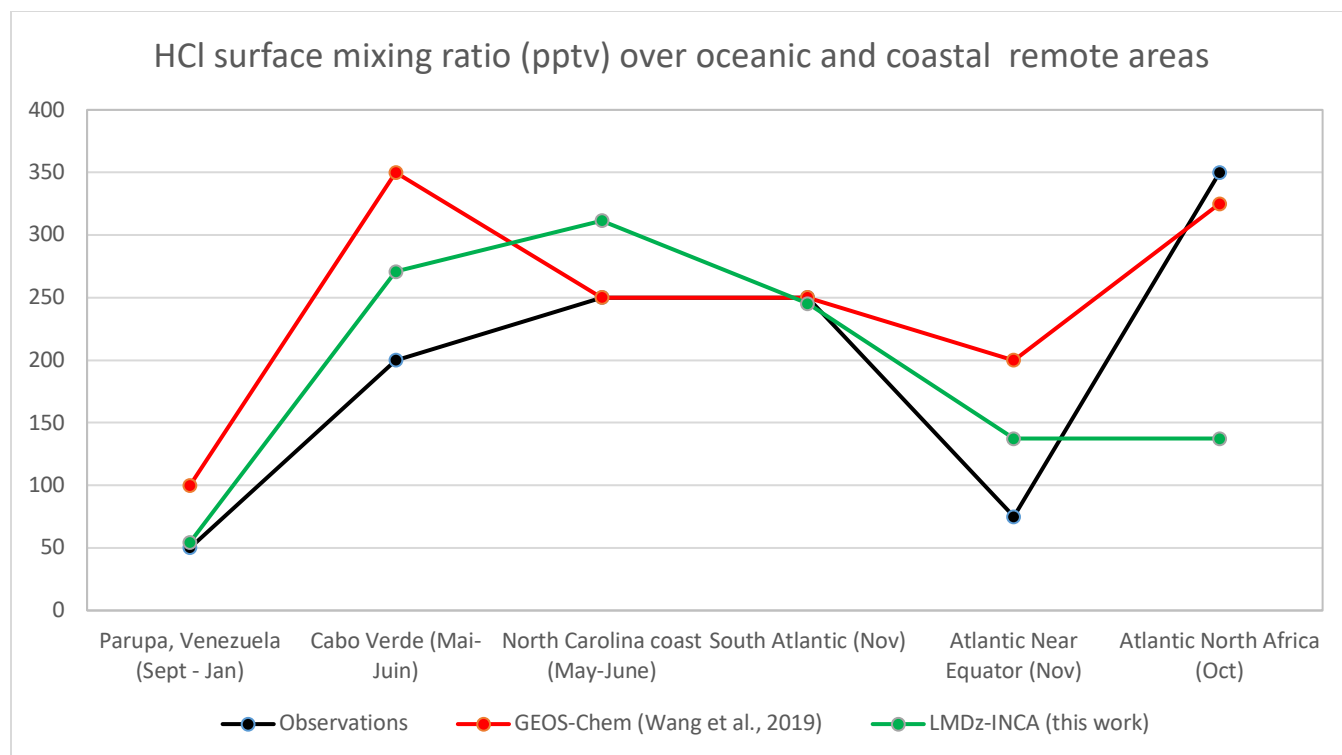

Figure S2. Average surface HCl mixing ratios from LMDz-INCA and GEOS-Chem (Wang et al., 2019) simulations as well as observations in coastal sites and oceanic areas. Observations are from Keene et al. (2009); Sanhueza and Garaboto (2002); Crisp et al. (2014) as reported by Wang et al. (2019).

Additional References for the Supplementary Material:

Keene, W. C., Long, M. S., Pszenny, A. A. P., Sander, R., Maben, J. R., Wall, A. J., O'Halloran, T. L., Kerkweg, A., Fischer, E. V., and Schrems, O.: Latitudinal variation in the multiphase chemical processing of inorganic halogens and related species over the eastern North and South Atlantic Oceans, *Atmos. Chem. Phys.*, 9, 7361–7385, <https://doi.org/10.5194/acp-9-7361-2009>, 2009.

Sanhueza, E., and Garaboto, A.: Gaseous HCl at a remote tropical continental site, *Tellus B*, 54, 412–415, <https://doi.org/10.3402/tellusb.v54i4.16675>, 2002.

Crisp, T. A., Lerner, B. M., Williams, E. J., Quinn, P. K., Bates, T. S., and Bertram, T. H.: Observations of gas phase hydrochloric acid in the polluted marine boundary layer, *J. Geophys. Res.-Atmos.*, 119, 6897–6915, <https://doi.org/10.1002/2013JD020992>, 2014.
